# Supplementary material
Source: PubMed Central journal article supplement (PMC3190307)

Supplementary Figure 1

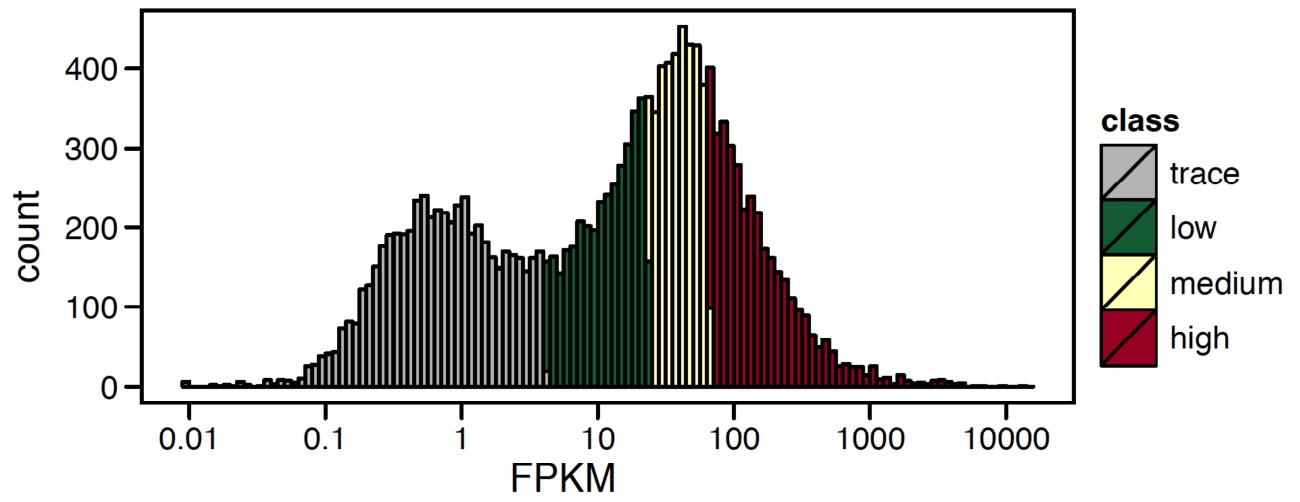

Supplement: NIHMS322290-supplement-06.pdf [file NIHMS322290-supplement-06.pdf]

## Supplementary Figure 2

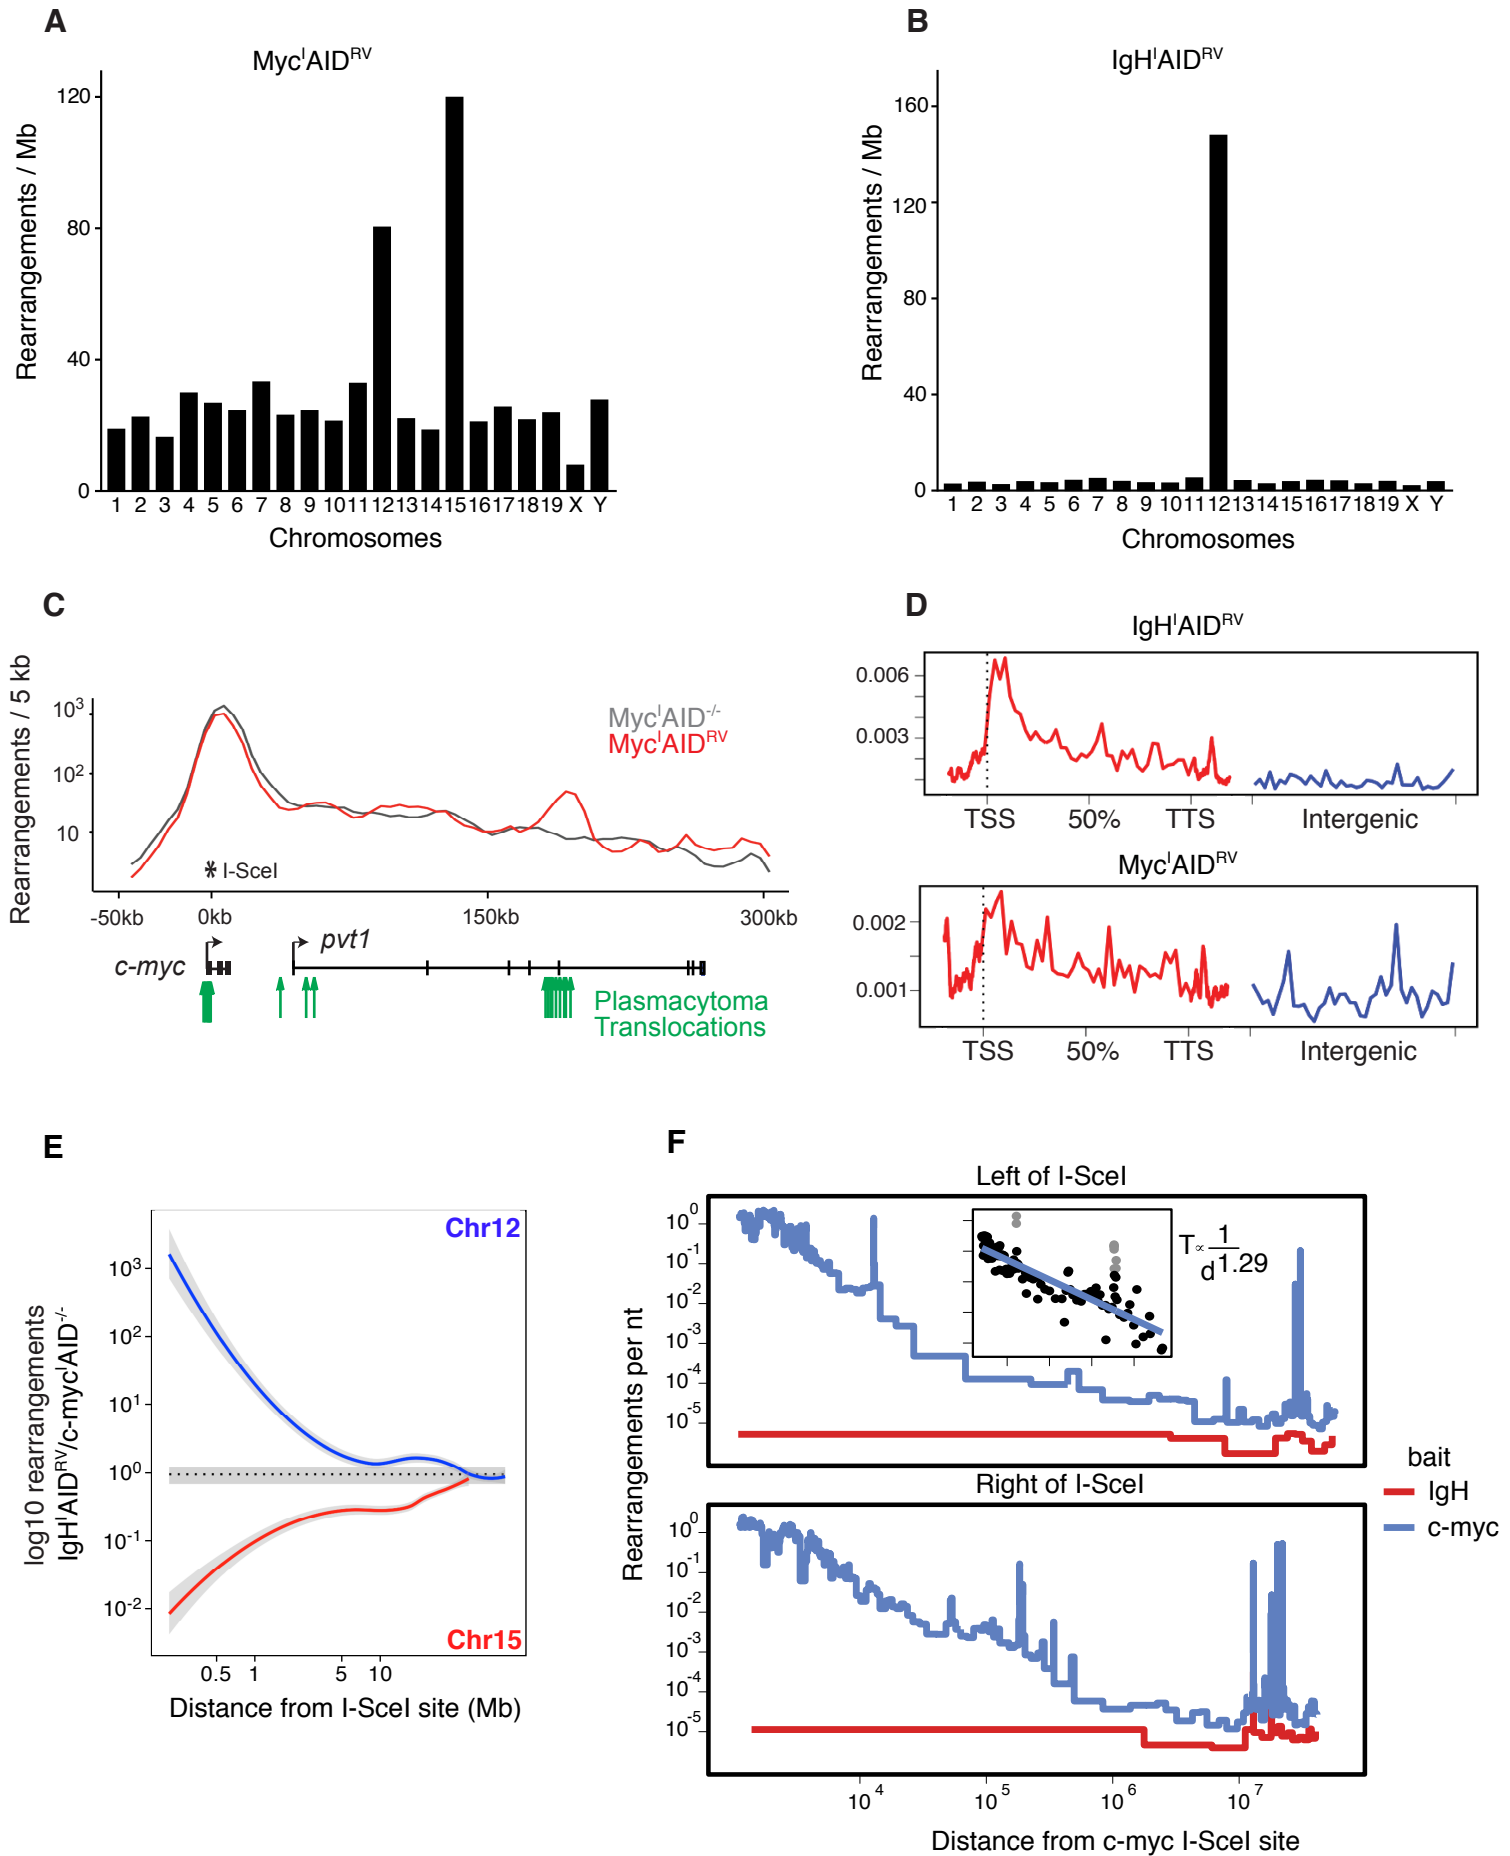

Supplement: NIHMS322290-supplement-07.pdf [file NIHMS322290-supplement-07.pdf]

### Supplementary Figure 3

chr15:16,218,271-16,220,148

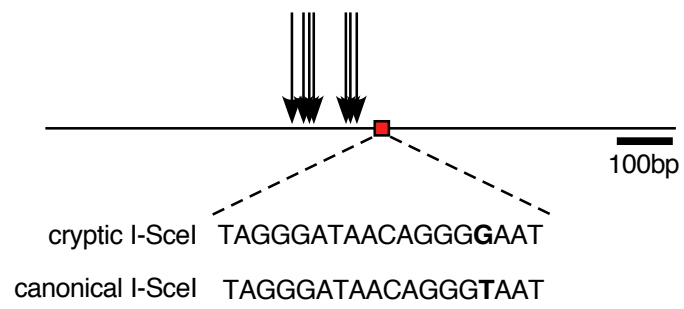

Supplement: NIHMS322290-supplement-08.pdf [file NIHMS322290-supplement-08.pdf]

## Supplementary Figure 4

**A**

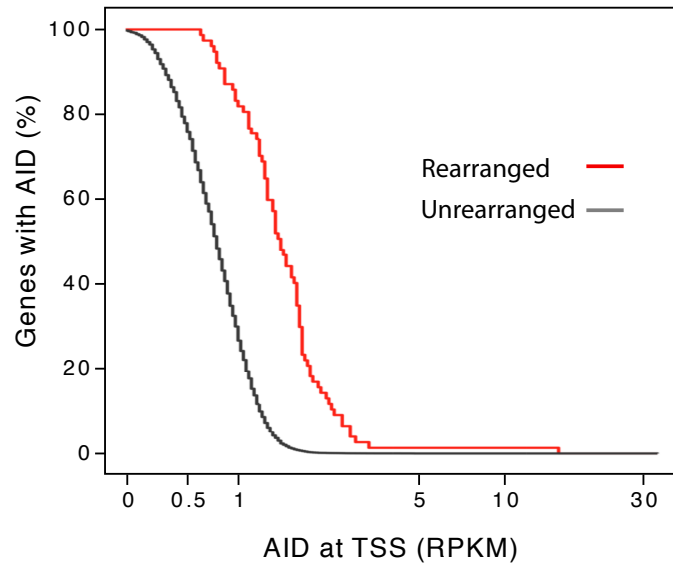

$P$  (Wilcoxon test)  $< 2.2e-16$

**B**

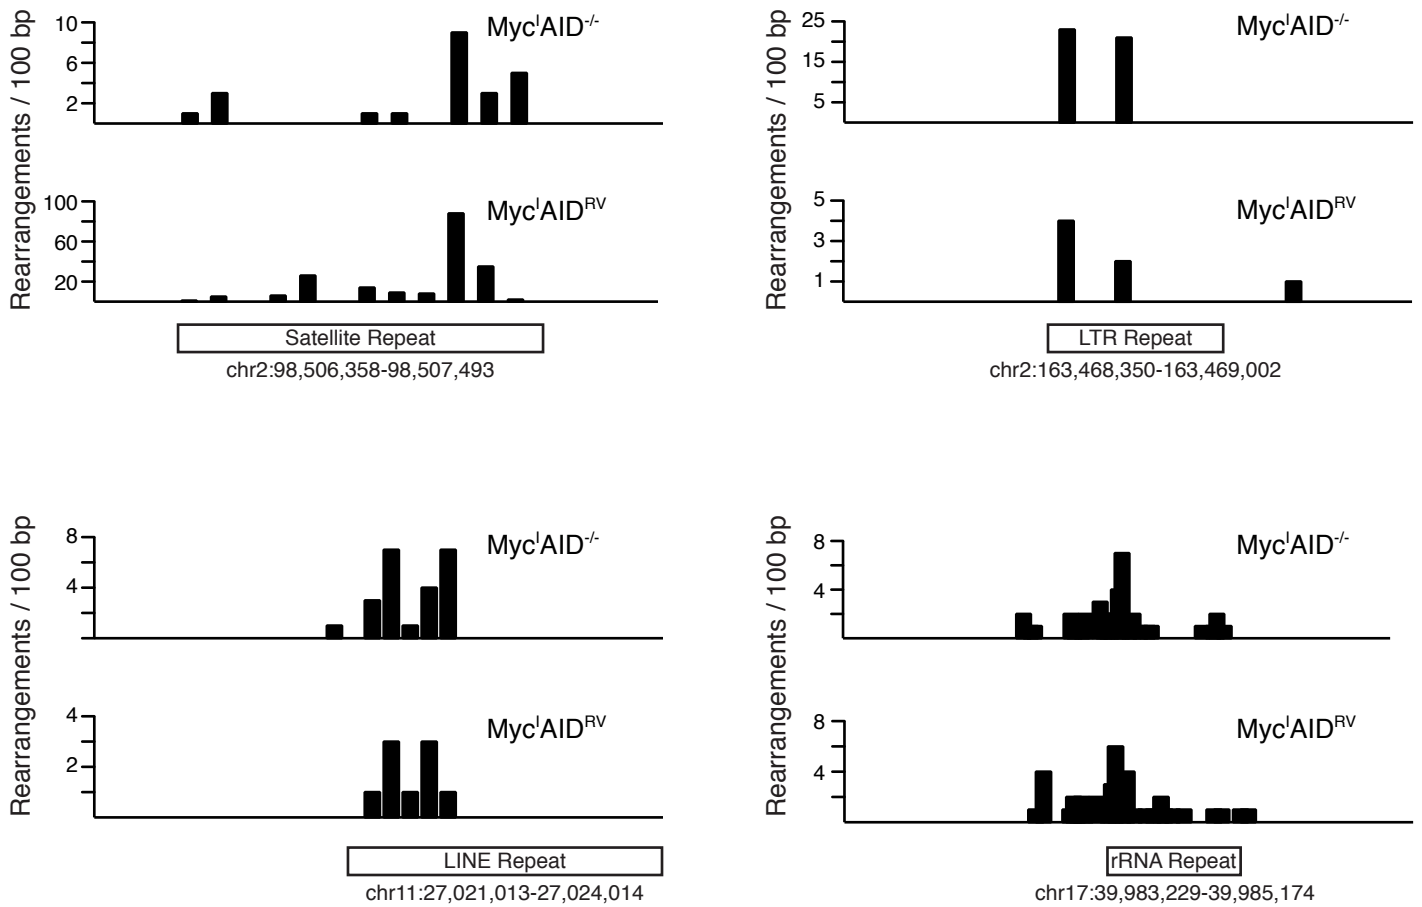

Supplement: NIHMS322290-supplement-09.pdf [file NIHMS322290-supplement-09.pdf]
